# Supplementary material for: Systematic analysis of curvature-dependent lipid dynamics in a stochastic 3D membrane model
Source: Royal Society of Chemistry journal article supplement (doi:10.1039/d2sm01260j), 2023-01-01
Supplement: d2sm01260j1.pdf [file d2sm01260j1.pdf]

*Supplementary Information for*

## **Systematic Analysis of Curvature-Dependent Lipid Dynamics in a Stochastic 3D Membrane Model**

Tanumoy Saha<sup>a,b,c,#</sup>, Andreas Heuer<sup>b,d,#,\*</sup> and Milos Galic<sup>a,b,#,\*</sup>

### **Content:**

- 1) Supplementary Information for Appendix
- 2) Supplementary Figure Legends
- 3) Supplementary Movie Legends
- 4) Supplementary Figures

## 1) Supplementary Information (for Appendix)

Define  $p(a,b)$  with  $a,b \in \{1, -1\}$  as the probability that two randomly selected spins have states  $a$  and  $b$ . Normalization yields  $p(1,1) + 2p(1, -1) + p(-1, -1) = 1$

**Calculation of  $\langle S_i S_j \rangle$  for 1D Ising model**

$$\langle S_i S_j \rangle = p(1,1) - 2p(1, -1) + p(-1, -1) = 1 - 4p(1, -1) = 1 - 4 \frac{N_A N_B}{N N - 1} = 1 - \frac{N}{(N-1)}(1 - M^2)$$

Note that the factor  $N-1$  takes these correlations into account.

This can be rewritten as

$$\langle S_i S_j \rangle = 1 - \frac{1}{\left(1 - \frac{1}{N}\right)}(1 - M^2) \approx 1 - \left(1 + \frac{1}{N}\right)(1 - M^2) = M^2 \left(1 + \frac{1}{N}\right) - \frac{1}{N}$$

The correlation is reflected by the  $1/N$ -terms.

**Calculation of  $\langle S_i S_j S_k S_l \rangle$  for 1D Ising model**

$$\begin{aligned} \langle S_i S_j S_k S_l \rangle &= p(1,1,1,1) - 4p(1,1,1, -1) + 6p(1,1, -1, -1) - 4p(1,1, -1, -1) + p(-1, -1, -1, -1) \\ &= 1 - 8p(1,1,1, -1) - 8p(1, -1, -1, -1) \end{aligned}$$

$$\begin{aligned} &= 1 - \frac{8}{N(N-1)(N-2)(N-3)} N_A N_B [(N_A - 1)(N_A - 2) + (N_B - 1)(N_B - 2)] \\ &= 1 - \frac{2(1 - M^2)N}{(N-1)(N-2)(N-3)} \left[ \frac{N(1+M) - 2}{2} \frac{N(1+M) - 4}{2} + \frac{N(1-M) - 2}{2} \frac{N(1-M) - 4}{2} \right] \\ &= 1 - \frac{(1 - M^2)N}{(N-1)(N-2)(N-3)} [N^2 M^2 + (N-2)(N-4)] \\ &= M^4 \frac{N^3}{(N-1)(N-2)(N-3)} - M^2 \frac{N^3 - N(N-2)(N-4)}{(N-1)(N-2)(N-3)} + 1 - \frac{N(N-4)}{(N-1)(N-3)} \\ &\approx M^4 \frac{N^3}{N^3 - 6N^2} - M^2 \frac{6N^2 - 8N}{N^3 - 6N^2} \approx M^4 \left(1 + \frac{6}{N}\right) - \frac{6M^2}{N} + O\left(\frac{1}{N^2}\right) \end{aligned}$$

**Calculation of  $\langle E^2 \rangle_M$  for 1D Ising model**

$$\begin{aligned} \langle E^2 \rangle_M &= J^2 [N + 2N \langle S_i S_k \rangle_M + (N^2 - 3N) \langle S_i S_j S_k S_l \rangle_M] \\ &\approx [N + 2NM^2 + (N^2 - 3N) [M^4 \left(1 + \frac{6}{N}\right) - \frac{6M^2}{N}]] \\ &\approx M^4(N^2 + 3N) - 4M^2N + N \end{aligned}$$

**Calculation of  $\langle E^2 \rangle_M - \langle E \rangle_M^2$  for 1D Ising model**

$$\begin{aligned} \langle E^2 \rangle_M - \langle E \rangle_M^2 &= J^2 [(N^2 + 3N)M^4 - 4M^2N + N - (N+1)^2M^4 + 2M^2(N+1) - 1] \\ &\approx J^2 [NM^4 - 2M^2N + N] \end{aligned}$$

when all extensive terms are taken into account

**Calculation of  $\langle E \rangle_M$  for Q neighbors**

$$\begin{aligned} \langle E \rangle_M &= -JN \left(\frac{Q}{2}\right) \langle S_i S_j \rangle_M = -JN \left(\frac{Q}{2}\right) \left[ M^2 \left(1 + \frac{1}{N}\right) - \frac{1}{N} \right] = -J \left(\frac{Q}{2}\right) [M^2(N+1) - 1] \\ \Rightarrow \langle E \rangle_M &= J^2 \left(\frac{Q}{2}\right)^2 [N^2M^4 + 2NM^4 - 2NM^2] + O(N^0) \end{aligned}$$

**Calculation of  $\langle E^2 \rangle_M - \langle E \rangle_M^2$  for Q neighbors**

$$\begin{aligned} \langle E^2 \rangle_M &= \left[ \frac{NQ}{2} \langle S_1^2 S_2^2 \rangle + NQ(Q-1) \langle S_1 S_2^2 S_3 \rangle + \left[ \left(\frac{NQ}{2}\right)^2 - NQ \left(Q - \frac{1}{2}\right) \right] \langle S_1 S_2 S_3 S_4 \rangle \right] \\ &= \left[ \frac{NQ}{2} + NQ(Q-1) \right] \left[ M^2 \left(1 + \frac{1}{N}\right) - \frac{1}{N} \right] + \left[ \left(\frac{NQ}{2}\right)^2 - NQ \left(Q - \frac{1}{2}\right) \right] \left[ M^4 \left(1 + \frac{6}{N}\right) - \frac{6M^2}{N} \right] \\ \Rightarrow \langle E^2 \rangle_M - \langle E \rangle_M^2 &= NM^2 \left[ Q(Q-1) - \frac{3Q^2}{2} + 2 \left(\frac{Q}{2}\right)^2 \right] + NM^4 \left[ \frac{NQ^2}{4} - Q^2 + \frac{Q}{2} + \frac{6Q^2}{4} - \frac{NQ^2}{4} - \frac{Q^2}{2} \right] \\ &= -NM^2Q + NM^4 \frac{Q}{2} \end{aligned}$$

## 2) Supplementary Figure Legends

**Figure S1: Supporting data for the numerical model. (A)** Hexagonal packing of lipids with  $SP = 1$  yields a planar membrane. **(B)** Hexagonal packing of lipids with  $SP = 0.8$  yields a positively curved membrane. **(C)** Graphical representation of the model. **(D)** Calculation of surface curvature. From left to right, a 3D surface, a polyhedral approximation of the surface, and the calculation of the surface curvature are shown.

**Figure S2: Supporting data for curvature-dependence of lipid enrichment. (A)** Temporal evolution of Lipid 'A' concentration on wedge-shaped rigid surface for  $\kappa = 27 k_B T$ . **(B)** Relative enrichment of lipid 'A' on wedge-shaped rigid surface using  $(\kappa = 27 k_B T; K_v = 0 k_B T)$ . Note a weak accumulation of lipid 'A' on the wedges and a slight decrease of accumulation upon temperature increase. **(C)** Lipid aggregates do not show any curvature dependency for  $(\kappa = 0 k_B T; K_v = 2 k_B T)$ . With increasing temperature, the lipid clusters diffuse. **(D)** Simulation of freely fluctuating membranes for a vesicle with a diameter of 300 nm composed of two lipid species with  $SP > 1$  and  $SP < 1$ , respectively. From top to bottom, simulations of  $(\kappa = 27 k_B T)$ , and  $(\kappa = 0 k_B T)$  are shown. For each condition, the relative concentration of lipid 'A' (left, top), local membrane curvature (left, bottom), and the correlation of these two parameters (right) are depicted. See also **Movie S1**.

---

## 3) Supplementary Movie Legends

**Movie S1: Temporal evolution of curvature-dependent lipid enrichment, as shown in Fig. S2D.** Temporal evolution of Lipid 'A' concentration on fluctuating membrane composed of two lipid species with  $SP < 1$  and  $SP > 1$  at a molar ratio of 1:1 using default parameter setting  $(\kappa = 27 k_B T; K_v = 2 k_B T; T = 300 K)$ .

**A**

$$SP = \frac{V}{A \cdot L} = 1$$

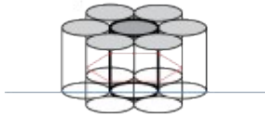**B**

$$SP = \frac{V}{A \cdot L} = .8$$

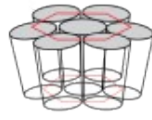**C**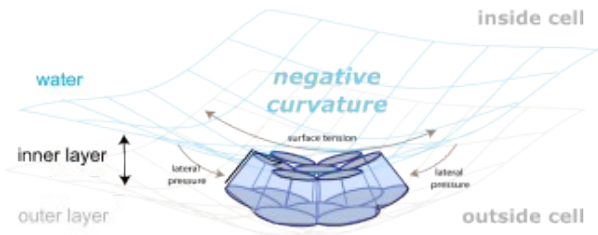**D****3D curved surface**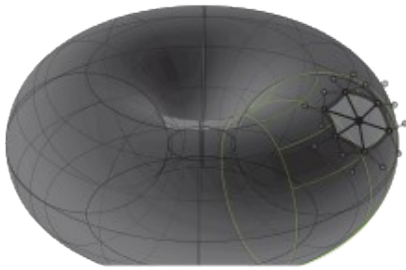**polyhedral approximation of the cell surface**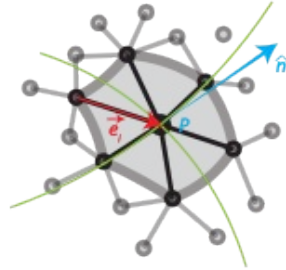**curvature tensor calculation**

**Fig. S1**  
Saha T., et. al

**A**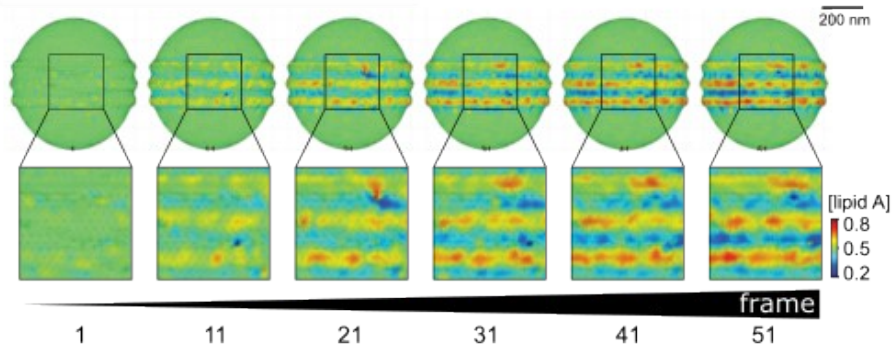**B**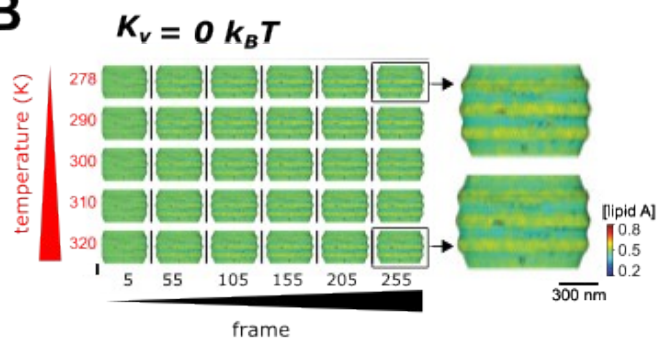**D**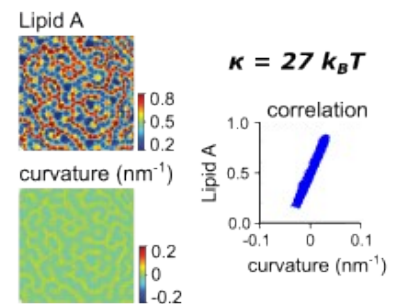**C**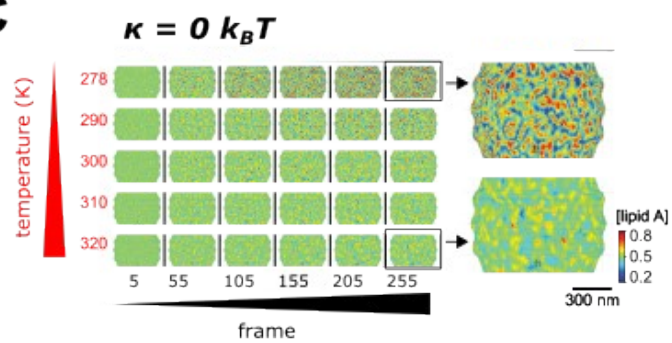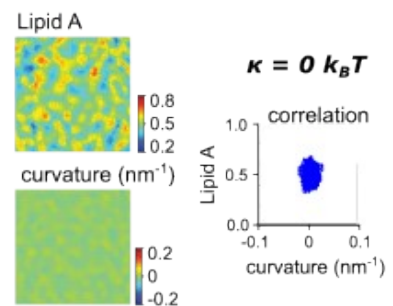

**Fig. S2**  
Saha T., et. al
